# Supplementary material for: Reduced post-operative DPP4 activity associated with worse patient outcome after cardiac surgery
Source: PubMed Central journal article supplement (PMC6081383; doi:10.1038/s41598-018-30235-w), 2018-08-07
Supplement: 41598_2018_30235_MOESM1_ESM.pdf [file 41598_2018_30235_MOESM1_ESM.pdf]

## **SUPPLEMENTARY INFORMATION**

### **Reduced post-operative DPP4 activity associated with worse patient outcome after cardiac surgery**

*Short title: DPP4 activity in cardiac surgery*

Heidi Noels<sup>1</sup>, Wendy Theelen<sup>1</sup>, Marieke Sternkopf<sup>1</sup>, Vera Jankowski<sup>1</sup>, Julia Moellmann<sup>2</sup>, Sandra Kraemer<sup>3</sup>, Michael Lehrke<sup>2</sup>, Nikolaus Marx<sup>2</sup>, Lukas Martin<sup>4</sup>, Gernot Marx<sup>4</sup>, Joachim Jankowski<sup>1,5</sup>, Andreas Goetzenich<sup>3</sup>, Christian Stoppe<sup>4</sup>.

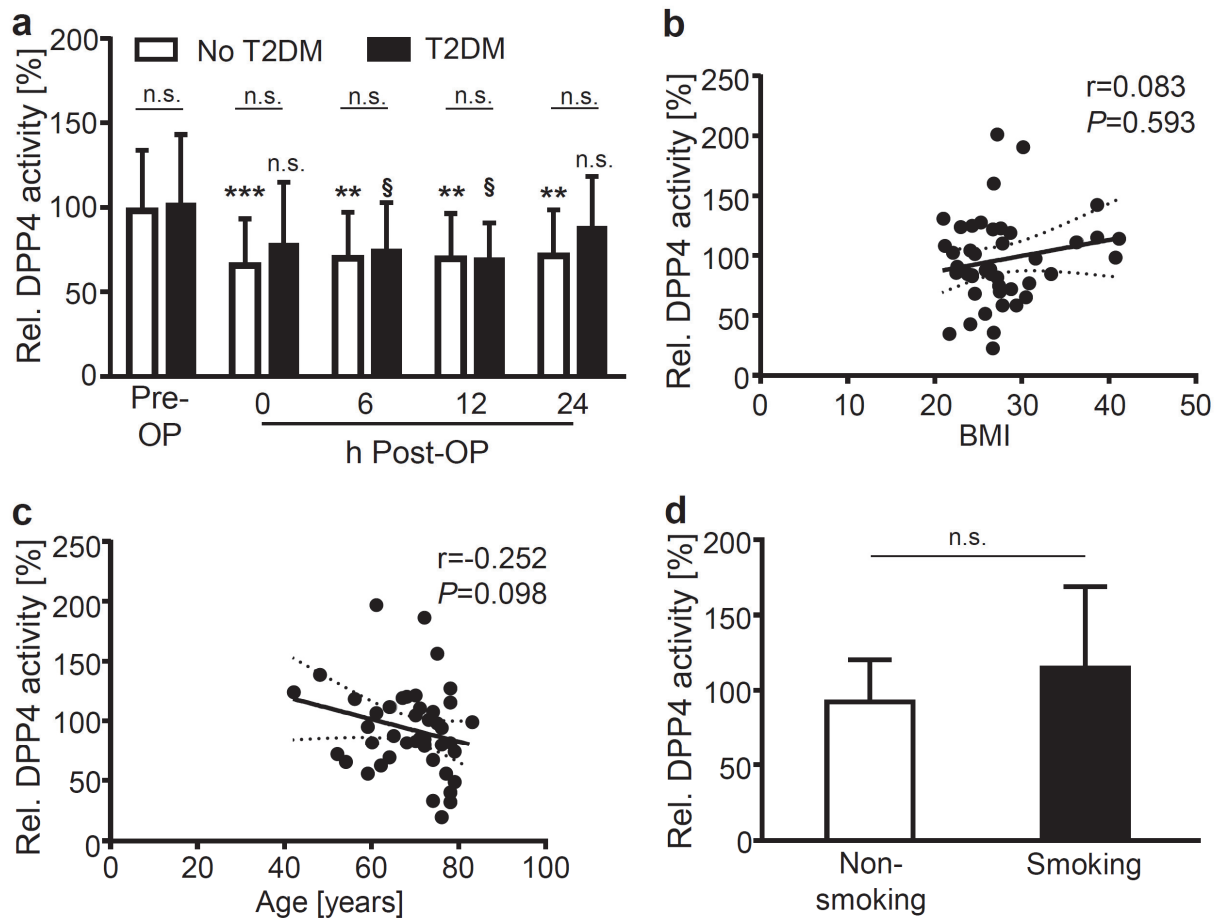

**Suppl. Figure 1. Effect of biometric and clinical parameters on pre-operative DPP4 activity.** Pre-operative serum DPP4 activity levels were quantified in patients scheduled for cardiac OP. **a**, Relative DPP4 activity levels in serum of patients without vs. with T2DM. no T2DM:  $n=18$  (24h post-OP) and  $26 \leq n \leq 28$  (other time points); with T2DM:  $n=12$  (24h post-OP) and  $14 \leq n \leq 17$  (other time points). Two-way ANOVA with Holm-Sidak's post-test to compare i) within each patient group DPP4 activity relative to pre-OP values of the respective patient group (\*\*/\*\*\*) for patients without diabetes; § for patients without diabetes); and ii) for comparing patients with vs. without T2DM at every time point (n.s. = not significant). **b-c**, Correlation between relative DPP4 activity and BMI (b) or age (c). Data are depicted as linear regression (black line) with 95% confidence intervals (dashed lines).  $r$  = Spearman correlation coefficient; two-tailed  $P$ -value. **d**, DPP4 activity levels in non-smoking vs. smoking patients.  $12 \leq n \leq 32$ . Unpaired two-tailed t-test. **a**, **d**, Shown are means  $\pm$  SD.

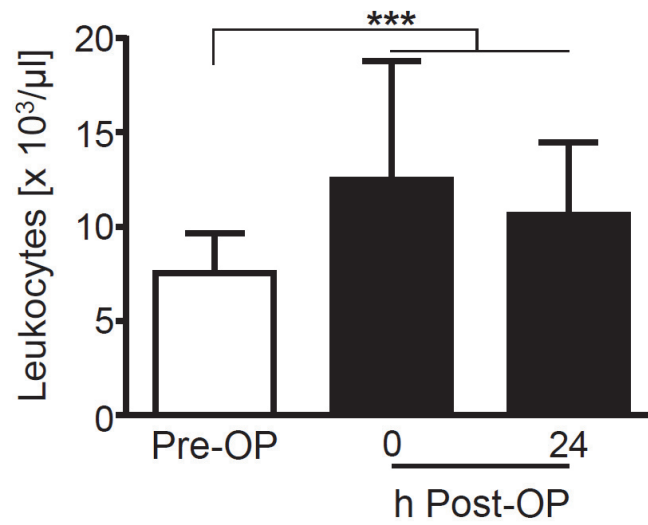

**Suppl. Figure 2. Cardiac operation induces a significant increase in circulating leukocyte counts.** Leukocytes were quantified in blood before (pre-OP) and at different time points after OP (post-OP), as indicated. Shown are means  $\pm$  SD.  $43 \leq n \leq 44$ . One-way ANOVA (Kruskal Wallis) with Dunn's post-test. \*\*\* $P < 0.001$ .

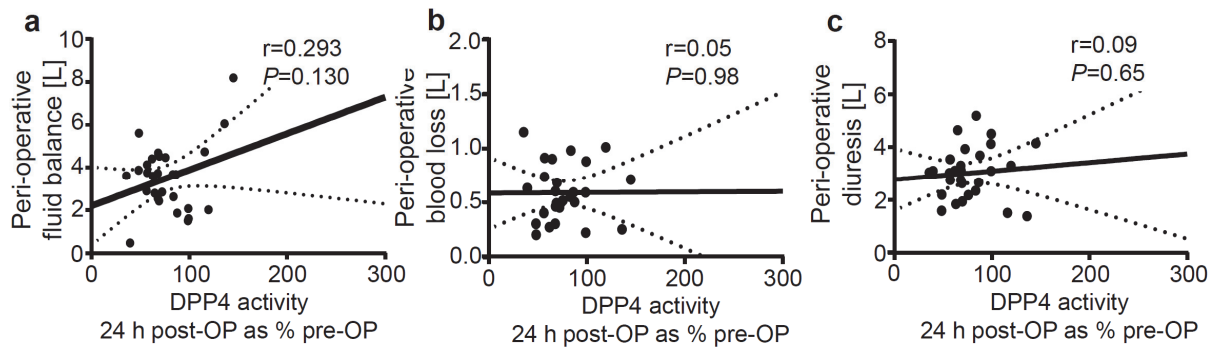

**Suppl. Figure 3. Effect of peri-operative fluid administration on DPP4 activity. a-c,** Correlation between 24 h post-OP activity as % pre-OP and fluid balance (a), blood loss (b) or peri-operative diuresis (c). Data are depicted as linear regression (black line) with 95% confidence intervals (dashed lines).  $r$  = Pearson correlation coefficient; two-tailed  $P$ -value.

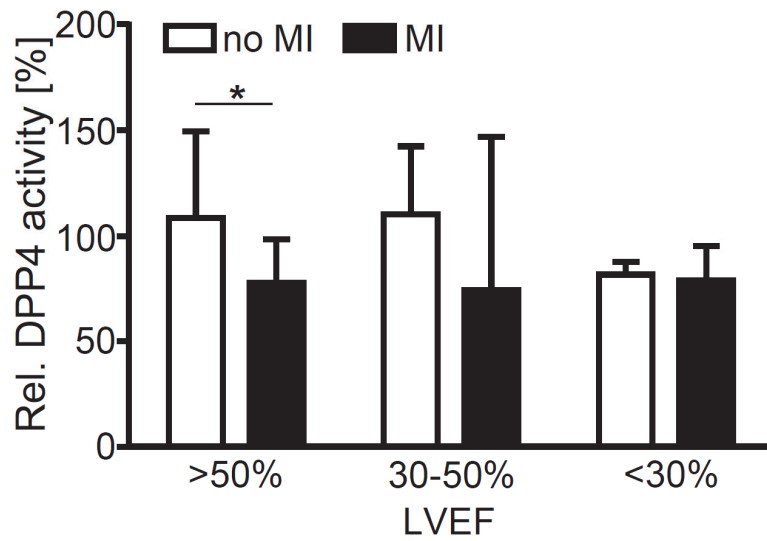

**Suppl. Figure 4. Effect of myocardial infarction and cardiac function on DPP4 activity.** Relative DPP4 activity levels in patients according to LVEF and occurrence of a prior MI within the 90 days prior to cardiac surgery.  $8 \leq n \leq 25$  (LVEF >50%);  $2 \leq n \leq 6$  (others). Mann-Whitney test;  $*P < 0.05$ . Depicted are means  $\pm$  SD.

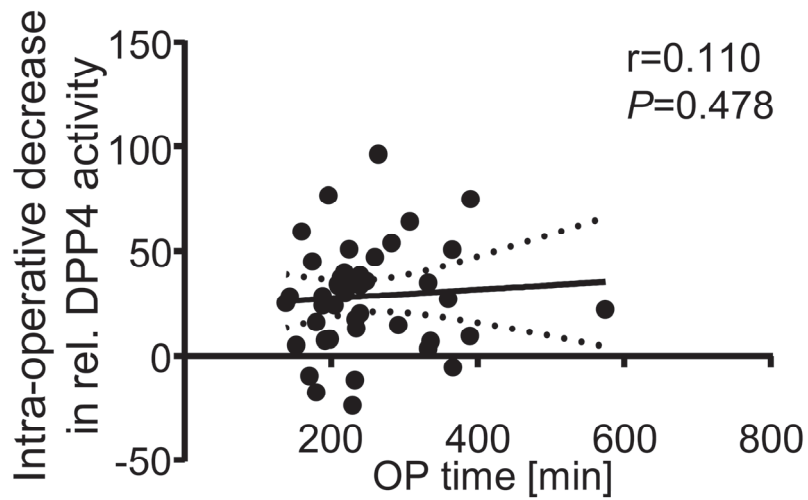

**Suppl. Figure 5. No correlation between the intra-operative DPP4 activity decrease and total operation time.** Correlation between the intra-operative decrease in relative DPP4 activity (pre-OP minus 0 h post-OP) and the overall duration of the surgery. Data are depicted as linear regression (black line) with 95% confidence intervals (dashed lines).  $r$  = Spearman correlation coefficient; two-tailed  $P$ -value.

**Suppl. Table. Correlations between the pre-operative levels of relative DPP4 activity (%) and the SAPS II or SOFA score directly after surgery (0 h post-OP) or 24 h post-OP.  $r$  = Pearson or Spearman correlation coefficient, as appropriate; two-tailed  $P$ -value.**

| <b>Correlations pre-operative DPP4 activity levels versus <math>x</math></b> | <b><math>r</math></b> | <b><math>P</math>-value</b> |
|------------------------------------------------------------------------------|-----------------------|-----------------------------|
| SAPSII (0 h post-OP)                                                         | -0.225                | 0.141                       |
| SAPSII (24 h post-OP)                                                        | -0.128                | 0.407                       |
| SOFA (0 h post-OP)                                                           | -0.108                | 0.485                       |
| SOFA (24 h post-OP)                                                          | -0.223                | 0.146                       |
